# Supplementary material
Source: PubMed Central journal article supplement (PMC3648211)
Supplement: NIHMS460660-supplement-supplement_1.pdf [file NIHMS460660-supplement-supplement_1.pdf]

*Supplemental Table 1. mRNA Expression Analysis.* For each gene tested, the average  $C_t$  value is given for LG/J and SM/J samples, as well as the associated standard error (SE). The significance of the difference between strains (listed under “Prob.”) and the associated  $R^2$  value are given for each sample. Bold values indicate significance at the  $p < 0.05$  level.

| Gene         | Av $C_t$ LG/J | Av $C_t$ SM/J | SE   | Prob.         | $R^2$ |
|--------------|---------------|---------------|------|---------------|-------|
| <i>Comp</i>  | 23.13         | 22.85         | 0.14 | <b>0.001</b>  | 13.5% |
| <i>Igf1</i>  | 28.57         | 28.91         | 0.16 | <b>0.022</b>  | 3.8%  |
| <i>Ihh</i>   | 26.32         | 26.58         | 0.18 | <b>0.001</b>  | 7.7%  |
| <i>Pthlh</i> | 30.84         | 31.24         | 0.15 | <b>0.010</b>  | 4.7%  |
| <i>Runx2</i> | 26.95         | 27.11         | 0.15 | 0.107         | 1.9%  |
| <i>Smad1</i> | 28.77         | 29.09         | 0.14 | <b>3.3E-5</b> | 17.2% |
| Male         | 29.15         | 29.72         | 0.17 | <b>1.1E-5</b> | 25.9% |
| Female       | 28.35         | 28.42         | 0.19 | 0.189         | 2.5%  |
| <i>Sox5</i>  | 29.17         | 29.35         | 0.15 | <b>0.031</b>  | 3.4%  |
| <i>Sox9</i>  | 24.57         | 25.26         | 0.13 | <b>1.1E-6</b> | 36.7% |
| <i>Tgfb1</i> | 25.89         | 26.01         | 0.12 | 0.100         | 1.9%  |
| <i>Vegfa</i> | 28.81         | 29.03         | 0.14 | <b>0.033</b>  | 3.2%  |

*Supplemental Table 2. QTL Positional Candidate Coding Region Polymorphisms.* QTL positional candidate genes tested for coding region polymorphisms are listed by chromosome, pleiotropic QTL name, gene name, and mRNA RefSeq number. The position of each SNP (in bp) in the gene and the strand (+ or -) are indicated; a \* denotes that two SNPs comprise a single polymorphism. The nucleotide at each polymorphism is given for the reference strain C57BL/6J (C57), LG/J (LG), and SM/J (SM). The change in amino acid residue is noted, followed by whether the amino acid change caused a change in chemical property (denoted with an X) as defined previously (see Results and (23)). The classification groups examined were polarity and volume (Pol/Vol), charge and aromaticity (Ch/Ar), or charge and polarity (Ch/Pol). Finally, using the cSNP tool of the PANTHER program (see Materials and Methods and (16-18)), the probability of the amino acid change being deleterious ( $P_{del}$ ) were calculated for each SNP (see (16-18)). The higher  $P_{del}$  is, the more likely that a change is deleterious. This information was only available for some SNPs.

| Chr | QTL            | Gene             | RefSeq       | SNP (bp)  | Strand | C57 | LG | SM | AA Change | Pol/Vol | Ch/Ar | Ch/Pol | $P_{del}$ |
|-----|----------------|------------------|--------------|-----------|--------|-----|----|----|-----------|---------|-------|--------|-----------|
| 1   | <i>Lbn1.1a</i> | <i>Atg9a</i>     | NM_001003917 | 75179497  | -      | C   | C  | G  | G780A     |         |       |        | 0.17      |
|     |                | <i>Chpf</i>      | NM_001001565 | 75472392  | -      | C   | C  | T  | R331Q     | X       | X     | X      | 0.82      |
|     |                | <i>Rufy4</i>     | NM_001170641 | 74176306  | +      | G   | G  | C  | A141P     |         |       |        | 0.13      |
|     |                |                  |              | 74187522  | +      | T   | C  | T  | V454A     | X       |       |        | 0.16      |
|     | <i>Lbn1.1b</i> | <i>Trip12</i>    | NM_133975    | 84790700  | -      | A   | G  | A  | F101L     | X       | X     |        |           |
| 2   | <i>Lbn2.1a</i> | <i>Kif18a</i>    | NM_139303    | 109173671 | +      | A   | A  | T  | Q736L     | X       |       | X      | 0.86      |
|     | <i>Lbn2.1b</i> |                  |              | 113673494 | -      | A   | A  | T  | L867H     | X       | X     | X      | 0.21      |
|     |                | <i>Arhgap11a</i> | NM_181416    | 113673926 | -      | C   | C  | A  | G723V     | X       |       |        | 0.05      |
|     |                |                  |              | 113683481 | -      | C   | C  | T  | A74T      |         |       | X      | 0.14      |
|     |                | <i>Zfp770</i>    | NM_175466    | 114022899 | -      | A   | A  | G  | W142R     | X       | X     | X      |           |
|     |                |                  |              | 114023279 | -      | A   | A  | C  | L15R      | X       | X     | X      |           |
|     |                | <i>Aven</i>      | NM_028844    | 112470054 | +      | T   | T  | C  | L245F     | X       | X     |        |           |
|     |                | <i>Fmn1</i>      | NM_010230    | 113365405 | +      | G   | G  | A  | G776E     | X       | X     | X      | 0.69      |
|     |                |                  |              | 113365676 | +      | T   | T  | G  | H866Q     | X       | X     | X      | 0.92      |
|     | <i>Lbn2.1c</i> |                  |              | 118998396 | -      | A   | A  | T  | F273Y     |         |       | X      | 0.7       |
|     |                |                  |              | 119005108 | -      | C   | C  | T  | G258S     |         |       | X      | 0.62      |
|     |                | <i>Dnajc17</i>   | NM_139139    | 119006271 | -      | C   | C  | A  | E184D     |         |       |        | 0.7       |
|     |                |                  |              | 119006702 | -      | C   | C  | T  | R161E     | X       | X     | X      | 0.77      |
|     |                |                  |              | 119009358 | -      | T   | T  | C  | Q152R     | X       | X     | X      | 0.67      |
|     |                | <i>Mapkbp1</i>   | NM_011941    | 119847031 | +      | G   | G  | C  | G900A     |         |       |        |           |

1  
2  
3  
4  
5  
6  
7  
8  
9  
10  
11  
12  
13  
14  
15  
16  
17  
18  
19  
20  
21  
22  
23  
24  
25  
26  
27  
28  
29  
30  
31  
32  
33  
34  
35  
36  
37  
38  
39  
40  
41  
42  
43  
44  
45  
46  
47  
48  
49

|   |                |                      |              |           |   |   |   |        |       |   |   |      |      |
|---|----------------|----------------------|--------------|-----------|---|---|---|--------|-------|---|---|------|------|
|   |                |                      | 119848202    | +         | A | A | G | H1056R |       |   |   |      |      |
|   |                |                      | 119848468    | +         | A | A | G | Q1090R | X     | X | X |      |      |
|   |                |                      | 119848950    | +         | A | A | G | H1167R |       |   |   |      |      |
|   |                |                      | 119849312    | +         | A | A | G | Q1212R | X     | X | X |      |      |
|   |                |                      | 119849477    | +         | T | T | C | V1267A | X     |   |   |      |      |
|   |                |                      | 119850850    | +         | A | A | G | T1432C | X     |   |   |      |      |
|   | <i>Lbn2.3a</i> |                      | 139946462    | -         | G | G | C | D808E  |       |   |   | 0.12 |      |
|   |                | <i>Esf1</i>          | NM_001081090 | 139993648 | - | T | T | G      | K168T | X | X | X    |      |
|   |                |                      |              | 139993713 | - | C | C | A      | Q146H | X |   | X    |      |
|   |                |                      |              | 139993882 | - | C | C | T      | S90N  | X |   | 0.29 |      |
|   |                | <i>Sptlc3</i>        | NM_175467    | 139392329 | + | G | G | T      | K209N | X | X | 0.72 |      |
|   |                |                      |              | 139407348 | + | G | G | A      | V309I |   |   | 0.42 |      |
|   |                | <i>2310003L22Rik</i> | NM_027093    | 139996639 | + | C | C | G      | D64E  |   |   | 0.13 |      |
|   |                | <i>Sell12</i>        | NM_001033296 | 140069695 | - | A | A | T      | L534M |   |   | 0.50 |      |
|   |                | <i>Macrod2</i>       | NM_001013802 | 142122308 | + | G | G | A      | V364M |   |   |      |      |
|   | <i>Lbn2.3b</i> |                      | 153754480    | +         | A | G | A | T354A  |       |   | X | 0.65 |      |
|   |                | <i>Rya3</i>          | NM_194357    | 153755094 | + | A | A | G      | I397V |   |   | 0.56 |      |
|   |                |                      |              | 153757199 | + | G | G | A      | M434I |   |   | 0.46 |      |
| 4 | <i>Lbn4.1</i>  | <i>Leprot</i>        | NM_175036    | 101328896 | + | A | G | A      | D92G  | X | X | X    | 0.28 |
|   |                | <i>Lepr</i>          | NM_010704    | 101437552 | + | A | G | A      | I359V |   |   |      |      |
|   |                | <i>Insl5</i>         | NM_011831    | 102699132 | - | A | C | A      | S56A  |   |   | X    |      |
|   | <i>Lbn4.2</i>  |                      | 131782224    | -         | C | C | T | S382K  | X     | X | X |      |      |
|   |                | <i>Gmeb1</i>         | NM_020273    | 131786982 | - | C | T | C      | V263I |   |   |      |      |
|   |                |                      |              | 132797022 | + | G | A | G      | G7R   | X | X | X    |      |
|   |                |                      |              | 132802856 | + | G | A | G      | V550M |   |   |      |      |
|   |                | <i>Map3k6</i>        | NM_016693    | 132802862 | + | A | G | A      | T552A |   |   | X    |      |
|   |                |                      |              | 132802885 | + | C | G | C      | D559E |   |   |      |      |
|   |                |                      |              | 132803155 | + | C | T | C      | A593V | X |   |      |      |
|   |                | <i>Rcan3</i>         | NM_022980    | 134981213 | - | T | A | T      | E37D  |   |   |      | 0.18 |
|   | <i>Lbn4.3</i>  | <i>Tnfsf15</i>       | NM_026281    | 63406030  | - | C | C | T      | G30E  | X | X | X    |      |

|    |               |                      |           |           |   |   |   |   |        |   |   |        |
|----|---------------|----------------------|-----------|-----------|---|---|---|---|--------|---|---|--------|
|    | <i>Lbn4.4</i> | <i>Cdc20</i>         | NM_023223 | 118109621 | - | T | G | T | T36P   |   |   | X      |
|    | <i>Lbn4.5</i> | <i>Snip1</i>         | NM_175246 | 124745402 | + | A | G | A | Q90R   | X | X | X      |
| 6  | <i>Lbn6.2</i> |                      |           | 146128853 | - | A | G | A | V2265A | X |   | 0.65   |
| 7  |               |                      |           | 146188951 | - | T | G | T | K1738T | X | X | X 0.29 |
| 8  |               | <i>Itpr2</i>         | NM_019923 | 146188979 | - | T | C | T | S1729G |   |   | X 0.32 |
| 9  |               |                      |           | 146189713 | - | T | C | T | I1710V |   |   |        |
| 10 |               |                      |           | 146331335 | - | C | G | C | E528D  |   |   |        |
| 11 |               | <i>4933424B01Rik</i> | NM_138757 | 146506127 | - | T | T | C | S303G  |   |   | X 0.12 |
| 12 |               | <i>Fgfr1op2</i>      | NM_026218 | 146538484 | + | A | A | G | M108V  |   |   | 0.29   |
| 13 |               |                      |           | 146554677 | - | C | C | A | V470F  | X | X |        |
| 14 |               |                      |           | 146559465 | - | T | T | C | I318V  |   |   |        |
| 15 |               | <i>Tm7sf3</i>        | NM_026281 | 146561954 | - | C | C | A | V296F  | X | X |        |
| 16 |               |                      |           | 146567061 | - | A | A | G | F283S  | X | X | X      |
| 17 |               |                      |           | 146568529 | - | T | T | C | T170A  |   |   | X      |
| 18 |               |                      |           | 146767353 | + | A | A | G | I164M  |   |   | 0.33   |
| 19 |               | <i>Arntl2</i>        | NM_172309 | 146769073 | + | T | T | C | Y207H  | X | X | X 0.85 |
| 20 |               |                      |           | 146769091 | + | A | A | G | M213V  |   |   | 0.41   |
| 21 |               |                      |           | 146778231 | + | C | C | T | P504L  | X |   | 0.43   |
| 22 |               |                      |           | 146801158 | + | G | G | T | R13L   | X | X | X      |
| 23 |               |                      |           | 146801212 | + | C | C | T | S31L   | X |   | X      |
| 24 |               | <i>1700023A16Rik</i> | NM_027059 | 146804656 | + | T | T | C | M62T   | X |   | X      |
| 25 |               |                      |           | 146807462 | + | T | T | C | V98A   | X |   |        |
| 26 |               |                      |           | 146819832 | + | T | T | G | L337V  |   |   |        |
| 27 |               | <i>1700034J05Rik</i> | NM_028509 | 146901480 | - | T | T | G | Q195H  | X | X | X      |
| 28 |               |                      |           | 146901916 | - | G | G | C | S50C   | X |   |        |
| 29 |               | <i>Ppfibp1</i>       | NM_026221 | 146954499 | + | T | T | C | L360P  | X |   | 0.57   |
| 30 |               | <i>2210417D09Rik</i> | NM_025620 | 146981493 | + | C | C | G | Q103E  |   | X | X      |
| 31 |               |                      |           | 146981793 | + | A | A | G | I203V  |   |   |        |
| 32 |               |                      |           | 146991348 | + | C | C | G | T11S   |   |   |        |
| 33 |               | <i>Mrps35</i>        | NM_145573 | 147009968 | + | G | G | A | C216Y  | X | X | 0.28   |
| 34 |               |                      |           | 147019259 | + | A | A | G | I293V  |   |   | 0.12   |

1  
2  
3  
4  
5  
6  
7  
8  
9  
10  
11  
12  
13  
14  
15  
16  
17  
18  
19  
20  
21  
22  
23  
24  
25  
26  
27  
28  
29  
30  
31  
32  
33  
34  
35  
36  
37  
38  
39  
40  
41  
42  
43  
44  
45  
46  
47  
48  
49

|    |                 |                |              |           |           |   |   |       |       |      |   |   |      |
|----|-----------------|----------------|--------------|-----------|-----------|---|---|-------|-------|------|---|---|------|
|    |                 |                | 147023650    | -         | C         | C | T | R330H |       |      |   |   |      |
|    |                 |                | 147023681    | -         | T         | T | C | M320V |       |      |   |   |      |
|    |                 |                | 147023698    | -         | C         | C | T | R314Q | X     | X    | X |   |      |
|    |                 |                | 147023750    | -         | T         | T | C | I297V |       |      |   |   |      |
|    |                 |                | 147023813    | -         | A         | A | G | W276R | X     |      |   | X |      |
|    |                 |                | 147023862    | -         | T         | T | G | K259N | X     | X    | X |   |      |
|    | <i>EG545893</i> | uc009est.1     | 147023999    | -         | T         | T | C | M214L |       |      |   |   |      |
|    |                 |                | 147024025    | -         | T         | T | G | N205T | X     |      |   |   |      |
|    |                 |                | 147024044    | -         | A         | A | T | L199I |       |      |   |   |      |
|    |                 |                | 147024112    | -         | G         | G | A | T176I | X     |      |   | X |      |
|    |                 |                | 147024119    | -         | C         | C | G | A174P |       |      |   |   |      |
|    |                 |                | 147024134    | -         | G         | G | A | P169S |       |      |   | X |      |
|    |                 |                | 147024181    | -         | C         | C | G | S153T |       |      |   |   |      |
|    |                 |                | 147024232    | -         | C         | C | G | S137T |       |      |   |   |      |
|    |                 | <i>Pthlh</i>   | NM_008970    | 147205487 | -         | G | G | T     | P166T |      |   | X | 0.20 |
| 7  | <i>Lbn7.1</i>   | <i>Hapln3</i>  | NM_178255    | 86262746  | -         | G | G | A     | A262V | X    |   |   | 0.50 |
|    |                 | <i>Lbn7.4</i>  | <i>Sox6</i>  | NM_011445 | 122944979 | - | C | T     | C     | M47I |   |   |      |
| 8  | <i>Lbn8.1a</i>  | <i>Cilp2</i>   | NM_026818    | 72405878  | -         | C | C | A     | A790S |      |   | X | 0.19 |
|    |                 |                |              | 72406790  | -         | C | C | T     | G486R | X    | X | X | 0.67 |
|    |                 | <i>Gdf1</i>    | NM_008107    | 72854735  | +         | A | T | A     | S145C | X    |   |   | 0.94 |
|    |                 | <i>Gdf15*</i>  | NM_011819    | 73153835  | -         | C | T | C     | T173A |      |   |   |      |
|    |                 | <i>Insl3*</i>  | NM_013564    | 74214158  | +         | T | G | T     | L88R  | X    | X | X | 0.10 |
|    | <i>Lbn8.1b</i>  | <i>Hhip</i>    | NM_020259    | 82581329  | -         | T | C | T     | N29S  | X    |   |   | 0.25 |
| 9  | <i>Lbn9.3</i>   | <i>Pcolce2</i> | NM_029620    | 95578805  | +         | A | T | A     | T163S |      |   |   | 0.88 |
| 10 | <i>Lbn10.2</i>  | <i>Os9</i>     | NM_001171026 | 126535465 | -         | T | C | T     | N453D |      | X | X | 0.56 |
|    |                 |                |              | 126535602 | -         | T | C | T     | D407G | X    | X | X | 0.43 |
|    |                 | <i>Rdh7</i>    | NM_017473    | 127321810 | -         | G | G | T     | Q250K | X    | X | X |      |
|    |                 | <i>Hsd17b6</i> | NM_013786    | 127428363 | -         | C | C | T     | A299T |      |   |   | X    |
|    |                 |                |              | 127430808 | -         | C | C | T     | V194I |      |   |   | 0.90 |
|    |                 | <i>Stat2</i>   | NM_019963    | 127721007 | +         | C | C | T     | A532V | X    |   |   | 0.71 |
|    |                 |                |              | 127727644 | +         | C | C | G     | H727Q | X    | X | X | 0.56 |

|    |                |                |              |           |   |   |   |       |        |   |          |
|----|----------------|----------------|--------------|-----------|---|---|---|-------|--------|---|----------|
|    |                |                | 127727937    | +         | T | T | C | L825P | X      |   | 0.58     |
|    |                |                | 127728080    | +         | C | C | A | L873M |        |   |          |
|    |                |                | 128231644    | +         | G | A | G | R80H  |        |   | 0.44     |
|    | <i>Mmp19</i>   | NM_021412      | 128231929    | +         | C | T | C | L120F | X      | X |          |
|    |                |                | 128233564    | +         | G | G | A | V297M |        |   | 0.64     |
|    |                |                | 128235989    | +         | T | T | C | S473P |        |   | X        |
|    | <i>Rdh5</i>    | NM_134006      | 128350946    | -         | T | T | G | E260D |        |   | 0.82     |
|    |                |                | 128351226    | -         | A | A | G | I233T | X      |   | X        |
|    | <i>Itga7</i>   | NM_008398      | 128380017    | +         | G | A | G | R315H |        |   | 0.71     |
|    |                |                | 128382560    | +         | A | A | C | T613P |        |   | X 0.40   |
| 11 | <i>Lbn11.2</i> | <i>Flt4</i>    | NM_008029    | 49438950  | + | C | T | C     | A126V  | X |          |
|    |                | <i>Col23a1</i> | NM_153393    | 51381401  | + | G | C | G     | A288P  |   | 0.57     |
|    |                | <i>Gdf9</i>    | NM_008110    | 53250607  | + | T | C | T     | I296T  | X | X        |
|    |                | <i>Kif3a</i>   | NM_008443    | 53400418  | + | A | G | A     | K404R  |   | 0.72     |
|    |                |                | 53412324     | +         | T | C | T | M683T | X      |   | X 0.71   |
| 12 | <i>Lbn12.1</i> | <i>Nkx2-9</i>  | NM_008701    | 57712825  | - | C | T | C     | R197H  |   |          |
|    | <i>Lbn12.4</i> | <i>Rdh12</i>   | NM_030017    | 80319824  | + | C | A | C     | L274I  |   | 0.83     |
| 13 | <i>Lbn13.1</i> | <i>Adamts6</i> | NM_001081020 | 105102839 | + | T | T | A     | S226T  |   | 0.41     |
| 14 | <i>Lbn14.1</i> |                |              | 87056221  | - | T | T | C     | K1142R |   | 0.32     |
|    |                |                |              | 87228885  | - | T | T | C     | I960V  |   | 0.55     |
|    |                | <i>Diap3</i>   | NM_019670    | 87366380  | - | C | C | A     | G550C  | X | X 0.87   |
|    |                |                |              | 87385469  | - | C | C | T     | S380N  | X | 0.50     |
|    |                |                |              | 87490835  | - | G | G | T     | P93T   |   | X 0.58   |
|    |                |                |              | 87905647  | + | C | C | G     | T408S  |   |          |
|    |                |                |              | 87905830  | + | A | A | G     | K469R  |   |          |
|    |                | <i>Tdrd3</i>   | NM_172605    | 87905889  | + | C | C | T     | L489F  | X | X 0.17   |
|    |                |                |              | 87906099  | + | G | G | T     | V559F  | X | X 0.20   |
|    |                |                |              | 87906152  | + | G | G | T     | R576S  | X | X X 0.15 |
|    |                | <i>Pcdh20</i>  | NM_178685    | 88866853  | - | C | C | G     | L939F  | X | X        |
|    |                |                |              | 88870769  | - | A | A | G     | L10S   | X | X        |

1  
2  
3  
4  
5  
6  
7  
8  
9  
10  
11  
12  
13  
14  
15  
16  
17  
18  
19  
20  
21  
22  
23  
24  
25  
26  
27  
28  
29  
30  
31  
32  
33  
34  
35  
36  
37  
38  
39  
40  
41  
42  
43  
44  
45  
46  
47  
48  
49

|    |                |                |              |          |   |   |   |   |        |   |   |        |
|----|----------------|----------------|--------------|----------|---|---|---|---|--------|---|---|--------|
| 15 | <i>Lbn15.2</i> | <i>Kif21a</i>  | NM_001109041 | 90797721 | - | A | A | C | I975S  | X |   | X      |
|    |                |                |              | 90816305 | - | T | T | C | M376V  |   |   | 0.93   |
|    | <i>Lbn15.3</i> | <i>Coll4a1</i> | NM_181277    | 55280294 | + | G | T | G | K1229N | X | X | X      |
|    |                |                |              | 55351491 | + | C | T | C | S1770F | X | X | X      |
| 19 | <i>Lbn19.1</i> | <i>Fosl1</i>   | NM_010235    | 5454995  | + | C | C | T | P170L  | X |   | 0.78   |
|    |                | <i>Ltbp3</i>   | NM_008520    | 5751413  | + | A | A | G | T662A  |   |   | X 0.85 |
|    |                | <i>Map4k2</i>  | NM_009006    | 6341786  | + | G | G | C | R66P   | X | X | X 0.99 |

For Peer Review

Supplemental Table 3. Known skeletal growth gene polymorphism summary. The number of polymorphisms in each region of the gene (+10K, 10 Kbp upstream; 5' UTR; Introns; Exons; and 3' UTR; -10K, 10 Kbp downstream) is given for each gene, as well as the total number of polymorphisms in all regions combined (Total). Bold numbers denote the presence of polymorphisms with PhastCon scores greater than 0.5; italicized number indicate the presence of polymorphisms with PhastCon scores greater than 0.95

| Gene         | +10K                  | 5' UTR   | Introns                  | Exons                | 3' UTR   | -10K      | Total |
|--------------|-----------------------|----------|--------------------------|----------------------|----------|-----------|-------|
| <i>COMP</i>  | 1                     |          |                          |                      |          | <b>4</b>  | 5     |
| <i>Igf1</i>  |                       |          | <b>5</b>                 | <i>1<sup>a</sup></i> |          |           | 6     |
| <i>Ihh</i>   | <b>33</b>             |          | 5                        |                      |          | 2         | 40    |
| <i>Pthlh</i> | <b>73</b>             | 2        | <b>46</b>                |                      |          | <b>57</b> | 178   |
| <i>Runx2</i> | 1                     |          | <b>578</b>               |                      | <b>3</b> | <b>28</b> | 610   |
| <i>Smad1</i> | <b>7</b>              |          | 24                       |                      |          |           | 31    |
| <i>Sox5</i>  | <b>74<sup>a</sup></b> | <b>1</b> | <b>3175<sup>ab</sup></b> |                      | <b>1</b> | <b>61</b> | 3312  |
| <i>Sox9</i>  |                       |          | 1                        |                      | 3        |           | 4     |
| <i>Tgfb1</i> | 9                     |          | 12                       |                      |          | <b>2</b>  | 23    |
| <i>Vegfa</i> | 1                     |          | <b>5</b>                 |                      | <b>1</b> | 8         | 15    |

<sup>a</sup> indicates the presence of a polymorphism in a *Foxa2* regulatory region

<sup>b</sup> indicates the presence of a polymorphism in an *Esr1* regulatory region
